# Supplementary material for: Atom and step economic multicomponent synthesis of highly functionalized novel N-alkyl piperidines: structural elucidation through spectral studies and single crystallographic analysis
Source: Royal Society of Chemistry journal article supplement (doi:10.1039/c4ra06505k), 2014-09-05
Supplement: c4ra06505k1.pdf [file c4ra06505k1.pdf]

# Atom and Step Economic Multicomponent Synthesis of Highly Functionalized Novel N-alkyl Piperidines: Structural Elucidation through Spectral Studies and Single Crystallographic analysis

Duraisamy Chinnaraja, Ramarajan Rajalakshmi\*

Department of Chemistry, Annamalai University, Annamalainagar-608 002. Tamilnadu, India.

Supplementary data ( <sup>1</sup>H NMR, <sup>13</sup>C NMR, <sup>1</sup>H-<sup>1</sup>H COSY, <sup>1</sup>H-<sup>13</sup>C COSY, DEPT and HR-Mass spectra (S1-S6) the synthesized compound 7

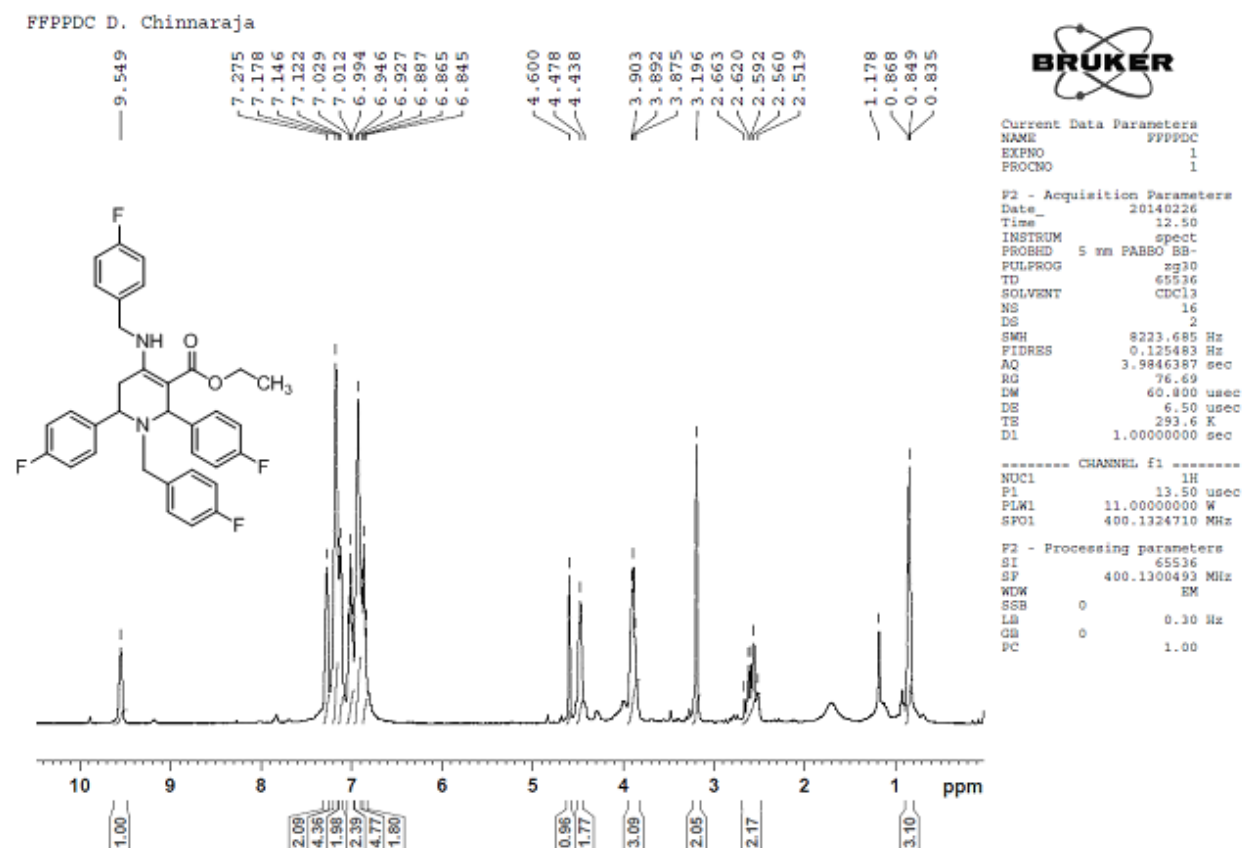

<sup>1</sup>H NMR spectrum of compound-7

FFPPDC D. Chinnaraja

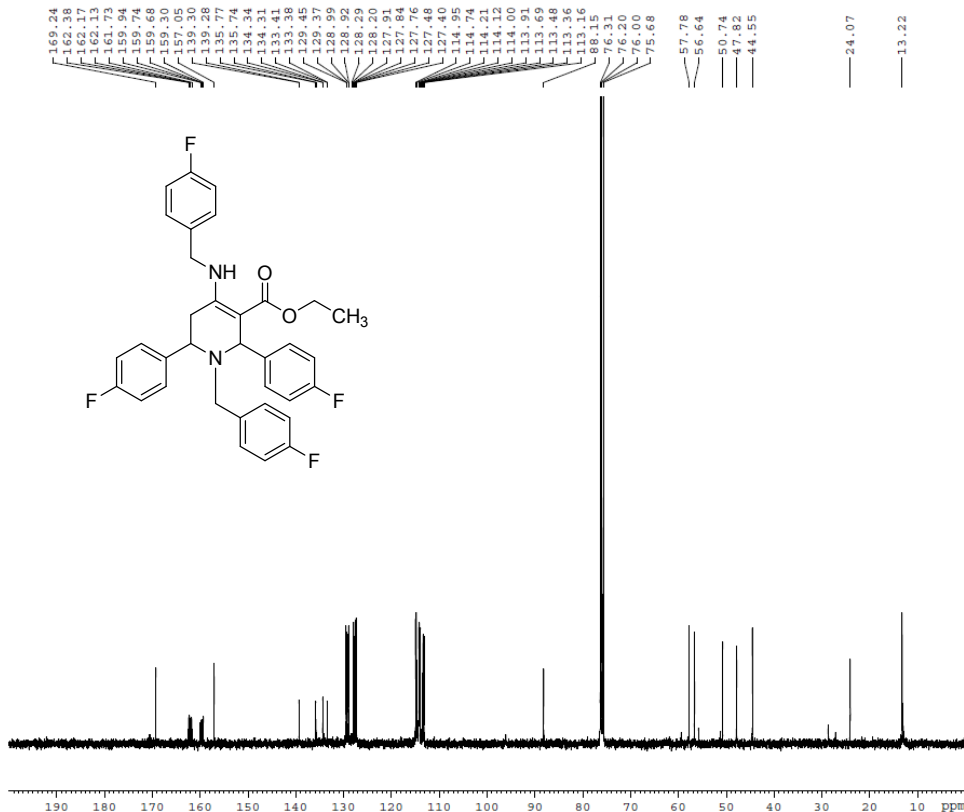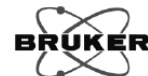

Current Data Parameters  
NAME FFPPDC  
EXPNO 4  
PROCNO 1

F2 - Acquisition Parameters  
Date\_ 20140226  
Time 15.16  
INSTRUM spect  
PROBHD 5 mm PABBO BB-  
PULPROG zgpg30  
TD 65536  
SOLVENT CDCl3  
NS 796  
DS 4  
SWH 24038.461 Hz  
FIDRES 0.366798 Hz  
AQ 1.3631988 sec  
RG 195.62  
DW 20.800 usec  
DE 6.50 usec  
TE 295.0 K  
D1 2.00000000 sec  
D11 0.03000000 sec

===== CHANNEL f1 =====  
NUC1 13C  
P1 8.25 usec  
PLW1 55.40000153 W  
SFO1 100.6228293 MHz

===== CHANNEL f2 =====  
CPDPRG2 waltz16  
NUC2 1H  
PCPD2 90.00 usec  
PLW2 11.00000000 W  
PLW12 0.24750000 W  
PLW13 0.20048000 W  
SFO2 400.1316005 MHz

F2 - Processing parameters  
SI 32768  
SF 100.6128759 MHz  
WDW EM  
SSB 0  
LB 1.00 Hz  
GB 0  
PC 1.40

<sup>13</sup>C NMR spectrum of compound-7

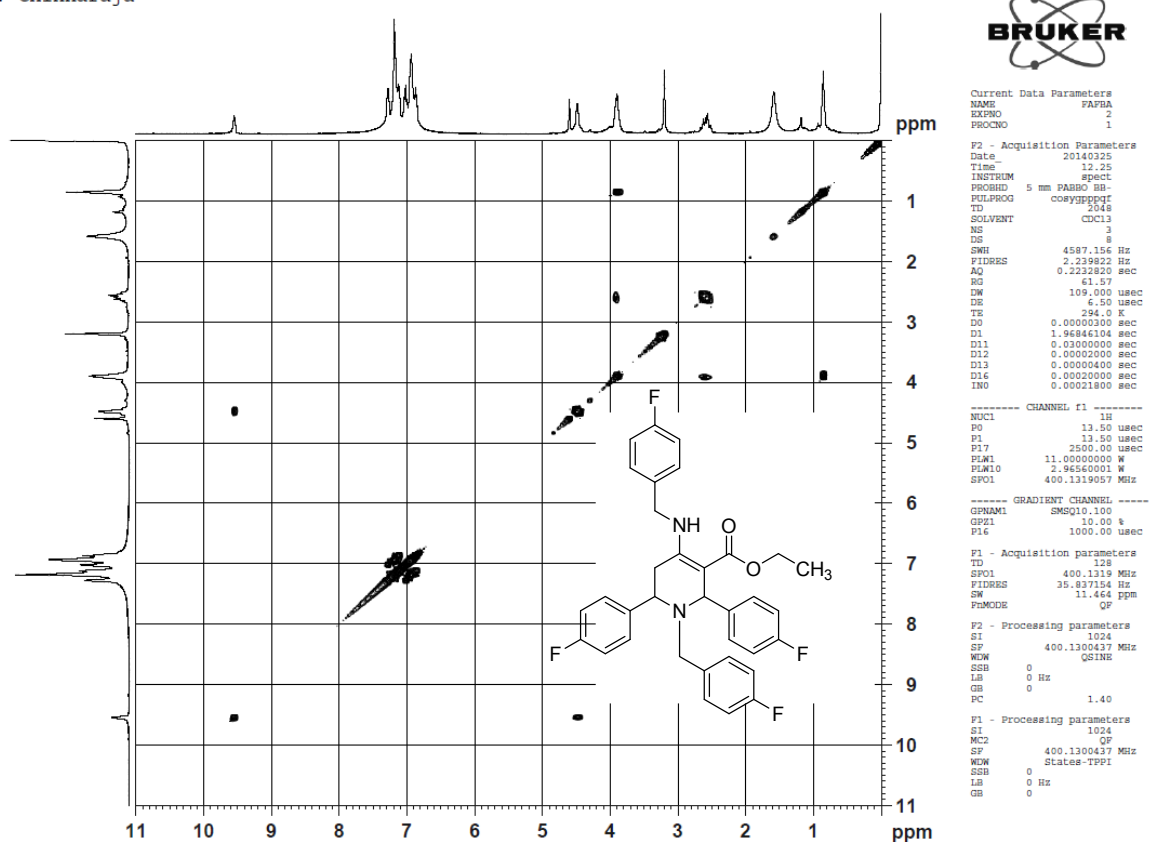 $^1\text{H}$ - $^1\text{H}$  COSY spectrum of compound-7

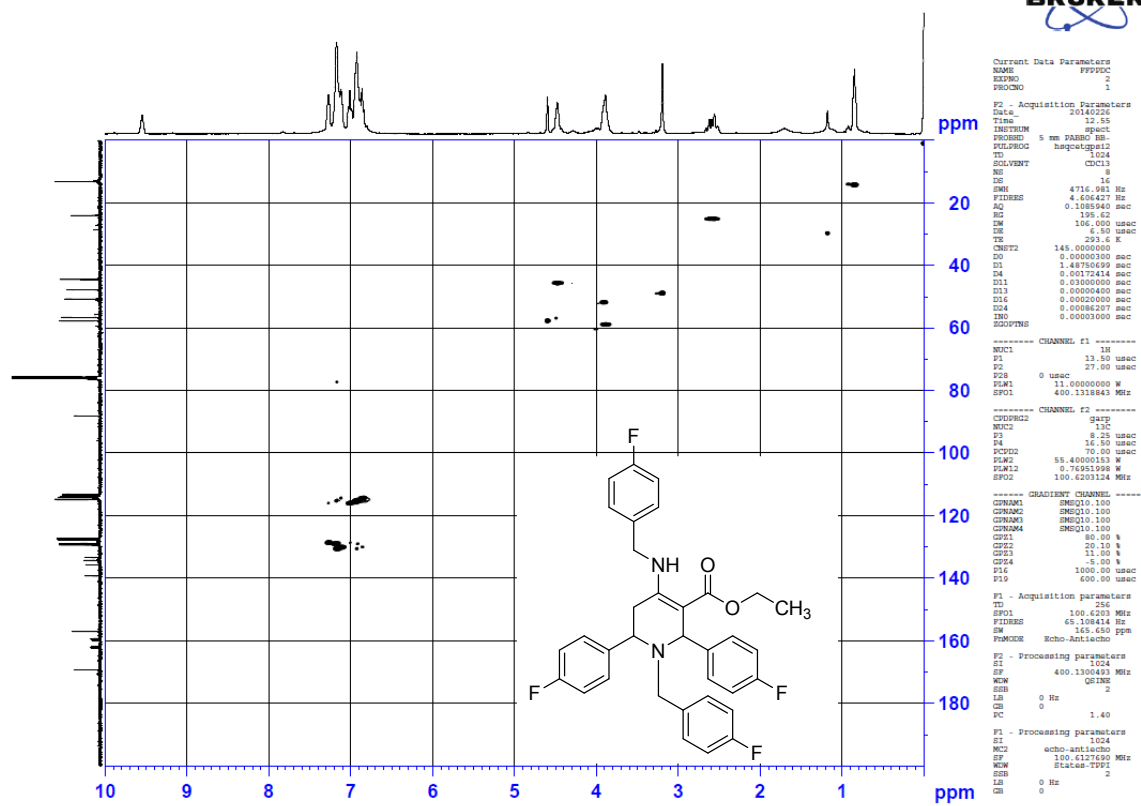

**$^1\text{H}$ - $^{13}\text{C}$  COSY spectrum of compound-7**

FFPPDC D. Chinnaraja

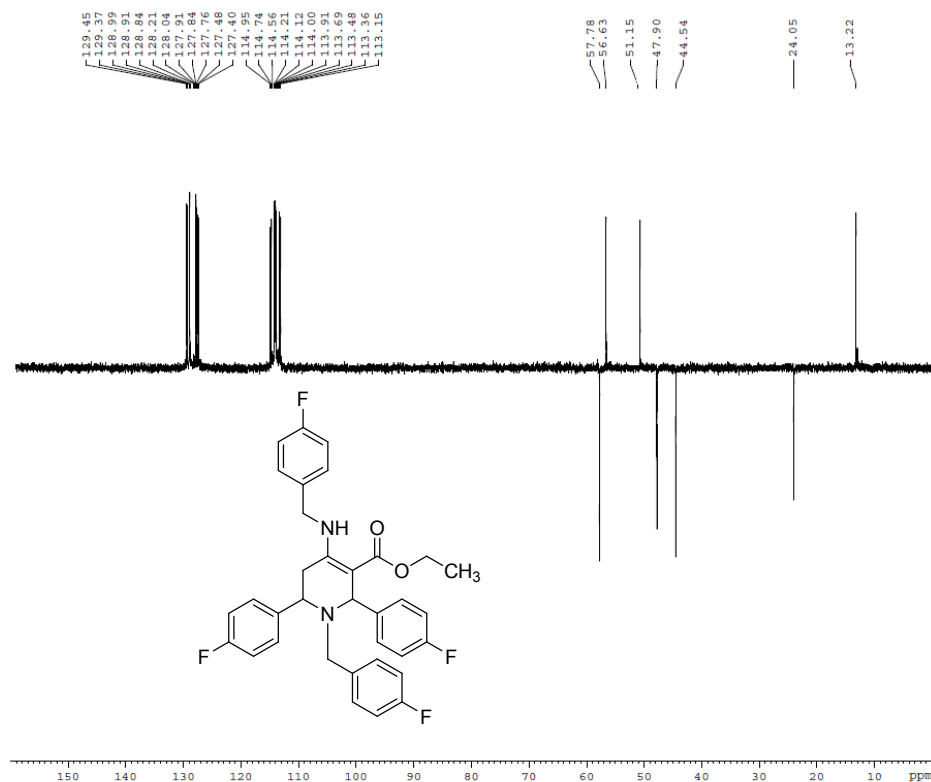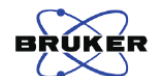

Current Data Parameters  
NAME FFPPDC  
EXPNO 3  
PROCNO 1

F2 - Acquisition Parameters  
Date\_ 20140226  
Time\_ 14.29  
INSTRUM spect  
PROBHD 5 mm PASBO BB-  
PULPROG deptap135  
TD 65536  
SOLVENT CDCl3  
NS 500  
DS 4  
SWH 16129.032 Hz  
FIDRES 0.246110 Hz  
AQ 2.0316660 sec  
RG 195.62  
DW 31.000 usec  
DE 6.50 usec  
TE 294.5 K  
CNST2 145.0000000  
D1 2.00000000 sec  
D2 0.00344828 sec  
D12 0.00002000 sec

===== CHANNEL f1 =====  
NUC1 13C  
P1 8.25 usec  
P13 2000.00 usec  
PLW0 0 W  
PLW1 55.40000153 W  
SFO1 100.6208171 MHz  
SPNAME Crp60comp.4  
SFOALS 0.500  
SFOFFS 0 Hz  
SFWS 5.76109982 W

===== CHANNEL f2 =====  
CPDPRG2 waltz16  
NUC2 1H  
P3 13.50 usec  
P4 27.00 usec  
PCPD2 90.00 usec  
PLW2 11.00000000 W  
PLW12 0.24750000 W  
SFO2 400.1312797 MHz

F2 - Processing parameters  
SI 32768  
SF 100.6128764 MHz  
WDW EM  
SSB 0  
LB 1.00 Hz  
GB 0  
PC 1.40

DEPT spectrum compound-7

# BRUKER MAXIS HRMS REPORT

School of Chemistry  
University of Hyderabad

## Analysis Info

Analysis Name D:\Data\2013\Dr.NAGARAJAN\DEC\TFACLF-R.d  
Method tune\_low\_Pos-R2.m  
Sample Name TFACLF-CHCL3-ACN  
Comment

Acquisition Date 12/19/2013 12:00:25 PM

Operator Ramu Sridhar  
Instrument maXis 10138

## Acquisition Parameter

|             |            |                       |           |                  |           |
|-------------|------------|-----------------------|-----------|------------------|-----------|
| Source Type | ESI        | Ion Polarity          | Positive  | Set Nebulizer    | 4.4 psi   |
| Focus       | Not active | Set Capillary         | 3800 V    | Set Dry Heater   | 180 °C    |
| Scan Begin  | 50 m/z     | Set End Plate Offset  | -500 V    | Set Dry Gas      | 4.0 l/min |
| Scan End    | 2580 m/z   | Set Collision Cell RF | 350.0 Vpp | Set Divert Valve | Waste     |

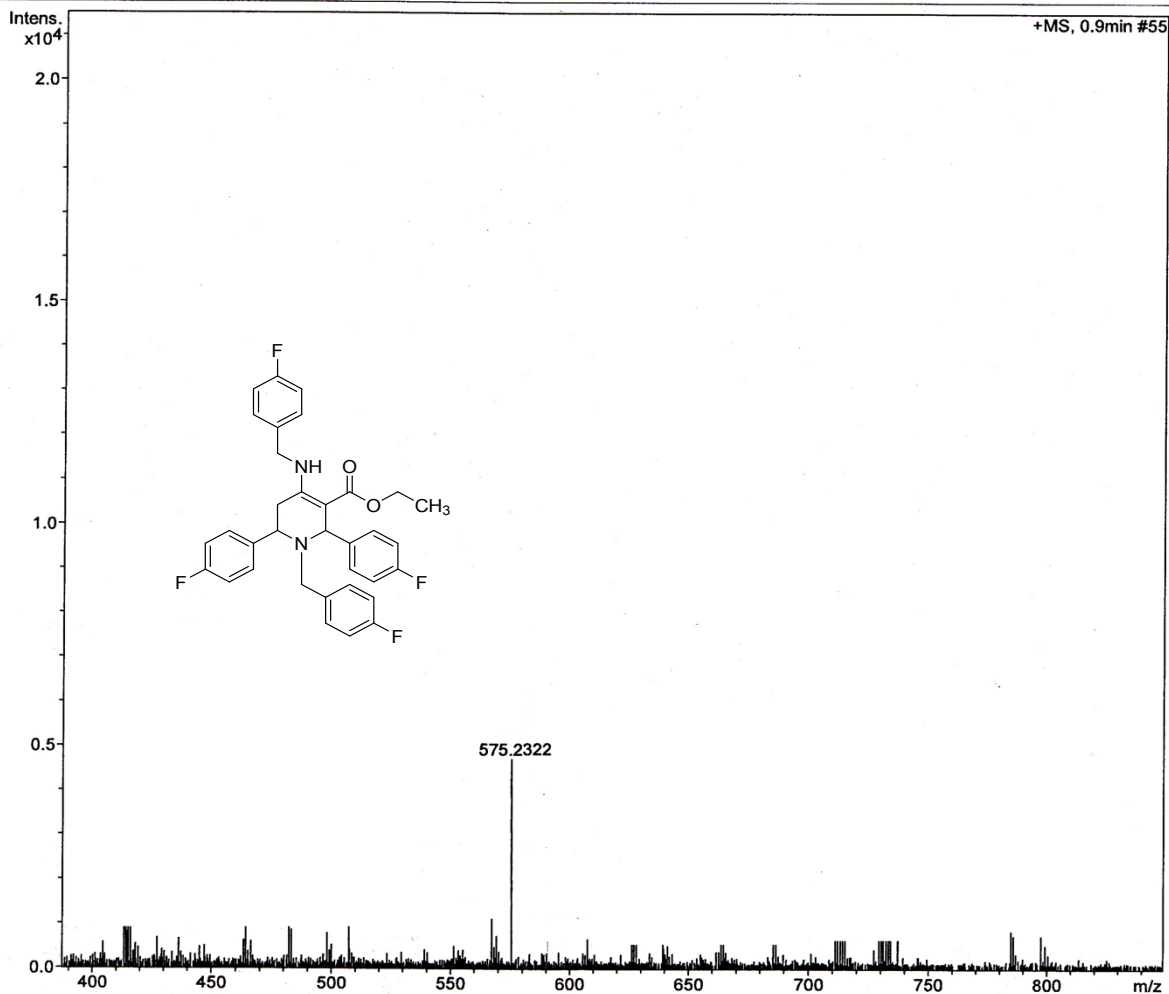

HR-Mass spectrum of compound-7
